# Supplementary material for: Translational Feasibility of Lumbar Puncture for Intrathecal AAV Administration
Source: PubMed Central journal article supplement (PMC7218226; doi:10.1016/j.omtm.2020.04.012), 2020-04-18
Supplement: mmc1.pdf [file mmc1.pdf]

**OMTM, Volume 17**

**Supplemental Information**

**Translational Feasibility of Lumbar Puncture  
for Intrathecal AAV Administration**

**Christian Hinderer, Nathan Katz, Cecilia Dyer, Tamara Goode, Julia Johansson, Peter Bell, Laura Richman, Elizabeth Buza, and James M. Wilson**

| Treatment (Dose)                       | Animal ID | Sex    | Necropsy (days post injection) |
|----------------------------------------|-----------|--------|--------------------------------|
| Vehicle (N/A)                          | RA2424    | Male   | 14                             |
|                                        | RA2456    | Male   | 90±2                           |
|                                        | RA2382    | Female | 180±2                          |
| Low dose (1.50 x 10 <sup>12</sup> GC)  | RA1156    | Male   | 14                             |
|                                        | RA2031    | Female |                                |
|                                        | RA0704    | Female |                                |
|                                        | RA0549    | Male   | 90±2                           |
|                                        | RA2369    | Female |                                |
|                                        | RA2412    | Female |                                |
|                                        | RA2464    | Male   | 180±2                          |
|                                        | RA2434    | Male   |                                |
| RA2413                                 | Female    |        |                                |
| Mid-dose (4.50 x 10 <sup>12</sup> GC)  | RA2463    | Male   | 14                             |
|                                        | RA2433    | Male   |                                |
|                                        | RA2410    | Female |                                |
|                                        | RA1875    | Male   | 90±2                           |
|                                        | RA1853    | Male   |                                |
|                                        | RA2360    | Female |                                |
|                                        | RA2467    | Male   | 180±2                          |
|                                        | RA2426    | Male   |                                |
| RA2150                                 | Female    |        |                                |
| High dose (1.35 x 10 <sup>13</sup> GC) | RA2444    | Male   | 14                             |
|                                        | RA2468    | Male   |                                |
|                                        | RA2363    | Female |                                |
|                                        | RA2457    | Male   | 90±2                           |
|                                        | RA2371    | Female |                                |
|                                        | RA2153    | Female |                                |
|                                        | RA2452    | Male   | 180±2                          |
|                                        | RA2400    | Female |                                |
| RA2375                                 | Female    |        |                                |

**Supplemental Table 1. Design of toxicology study for ICM administration of AAVhu68 expressing human SMN in adult NHPs.**

Animals were randomized to treatment groups. All injections were performed in a total volume of 1 mL.

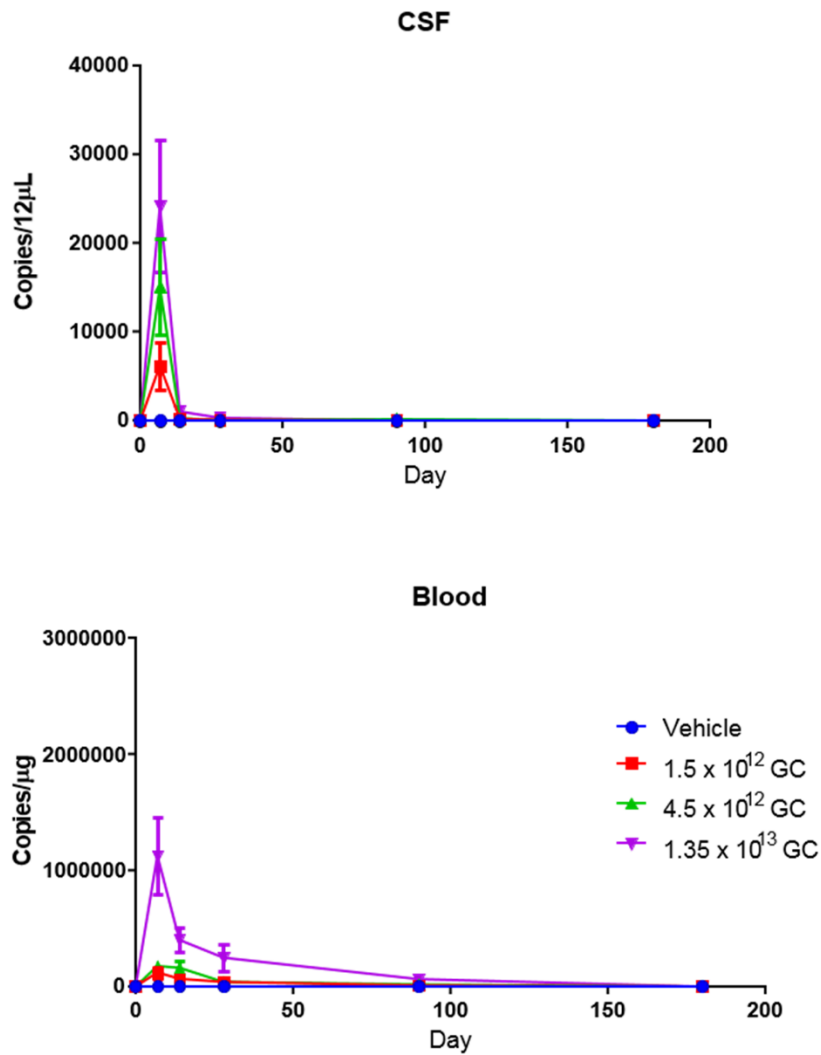

**Supplemental Figure 1. Vector Genomes Measured in CSF and Blood Following ICM Administration to NHPs.**

Each line represents mean vector genomes detected per microgram DNA (blood) or per 12  $\mu$ L of CSF for each cohort. Error bars represent SEM.

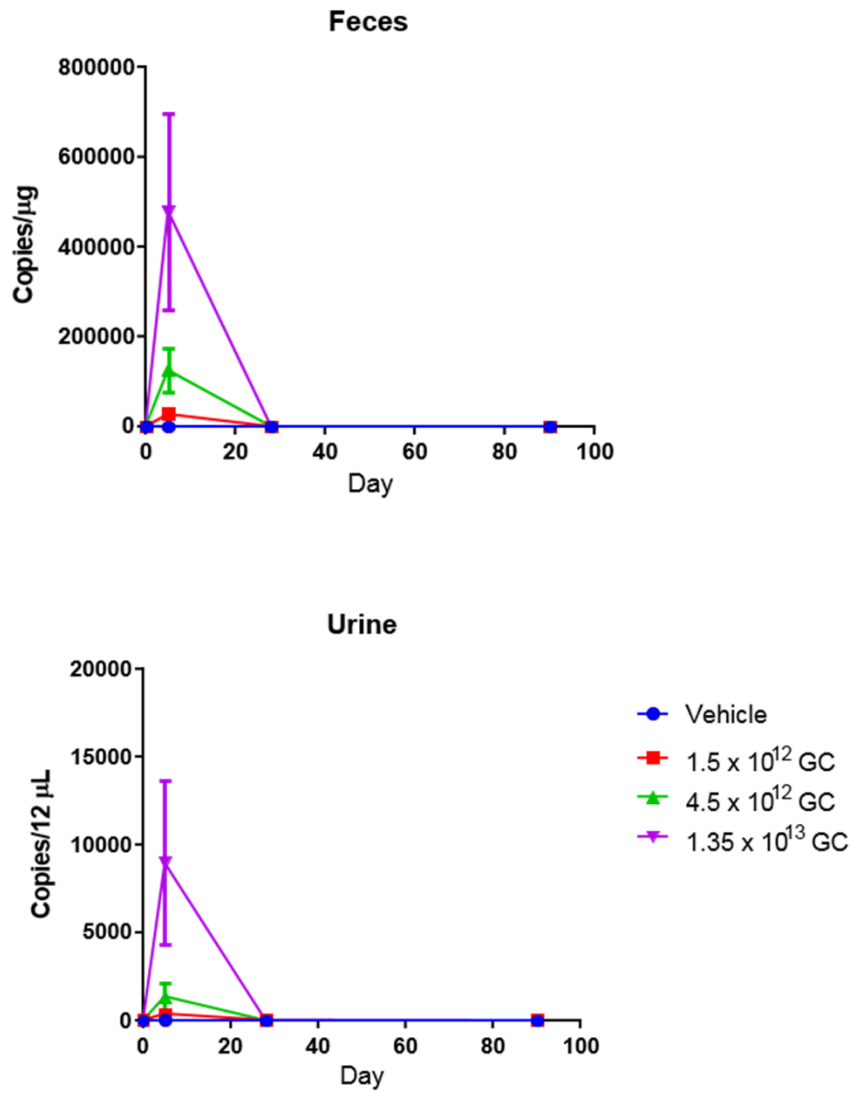

**Supplemental Figure 2. Vector Excretion in Feces and Urine Following ICM Administration to NHPs**

Each line represents mean vector genomes detected per  $\mu\text{g}$  DNA (feces) or per 12  $\mu\text{L}$  of urine for each cohort. Error bars represent SEM.

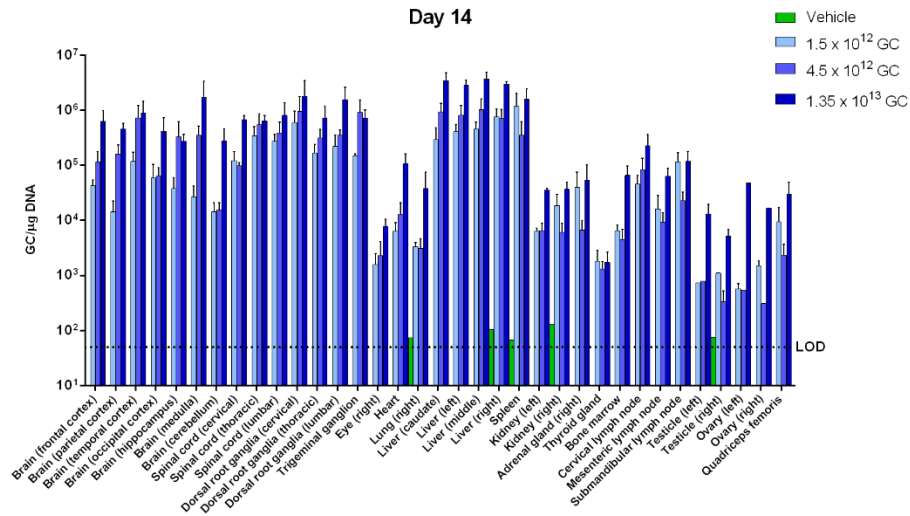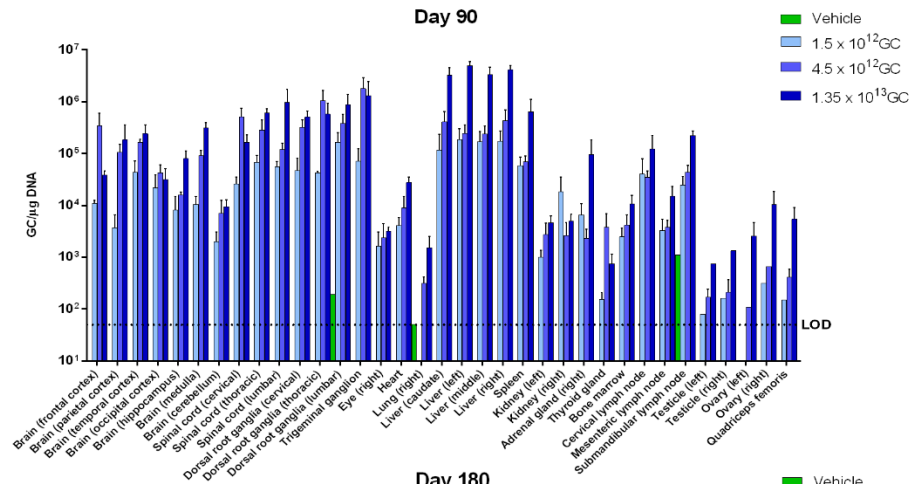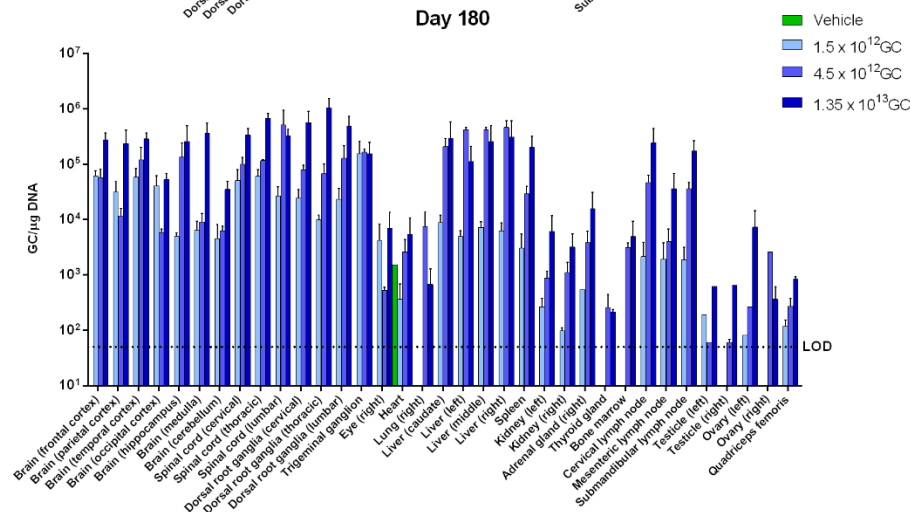

**Supplemental Figure 3. Vector Biodistribution Following ICM Administration to NHPs.** Each bar represents mean vector genomes detected per  $\mu\text{g}$  DNA. Error bars represent SEM. LOD = limit of detection (50 copies per  $\mu\text{g}$  DNA).

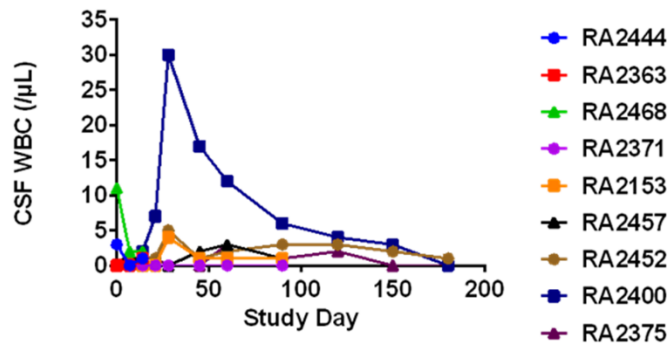

**Supplemental Figure 4. CSF leukocyte counts in high dose cohort**

AAVhu68 expressing human SMN was administered ICM to adult rhesus macaques at a dose of  $1.35 \times 10^{13}$  GC on Day 0. WBC = white blood cells.

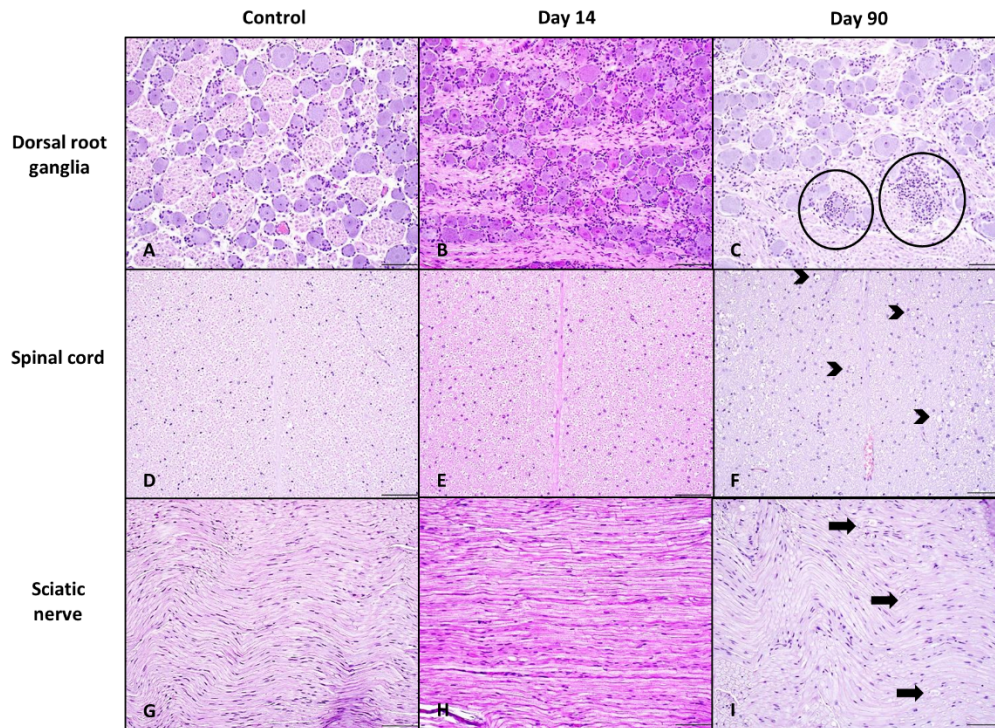

**Supplemental Figure 5. Representative central and peripheral nervous system histopathologic findings in nonhuman primates administered AAVhu68 expressing human SMN via ICM injection.** Pertinent vector-related findings were observed in the central and peripheral nervous system, primarily at the day 90 and day 180 time-point, with no dose effect. At the day 14 time-point, dorsal root ganglia (DRG) from a majority of vector-treated animals were histologically normal (A-B). Single neuronal degeneration was sporadically observed in few dorsal root ganglia segments and trigeminal ganglia of vector-treated animals as well as the trigeminal ganglia of the day 14 control animal; however, definitive interpretation of these findings were difficult due to limited number of control animals. No significant histologic findings were noted in the spinal cord (D-E) and peripheral nerves (shown: sciatic nerve; G-H) of vehicle control and vector-treated animals from the day 14 time-point. The dorsal root ganglia in few segments from treated groups at the day 90 time-point (C) had minimal neuronal cell body degeneration (circles) characterized by central chromatolysis, satellitosis and mononuclear cell infiltrates that surrounded and invaded neuronal cell bodies (neuronophagia). The majority of animals from all vector-treated groups had a minimal to moderate axonopathy of the dorsal white matter tracts of the spinal cord (F), which was bilateral and characterized by dilated myelin sheaths with and without myelomacrophages (arrowheads), consistent with axonal degeneration. The majority of these animals had a similar minimal to mild axonopathy (arrows) in peripheral nerves of both the fore- and hindlimbs (shown: sciatic nerves; I). A dose effect was not observed in any of the test article related findings. Findings at the day 180 time point were similar to those shown for Day 90, although severity was lower on Day 180. (Hematoxylin and eosin; Scale bar = 100  $\mu$ m).

## Dorsal Root Ganglia

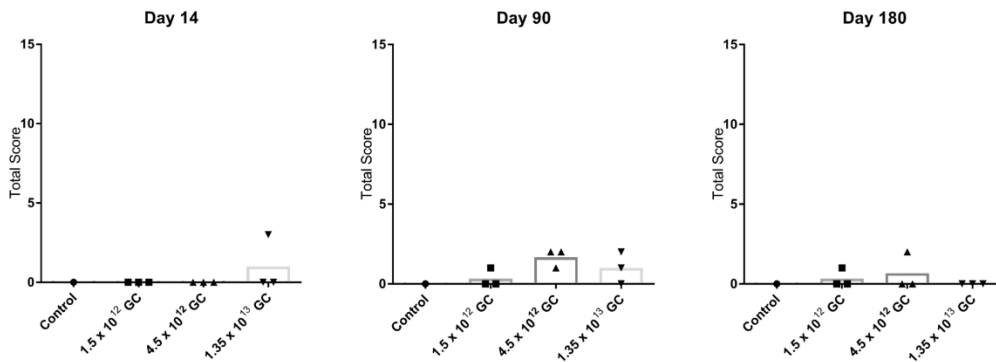

## Spinal Cord

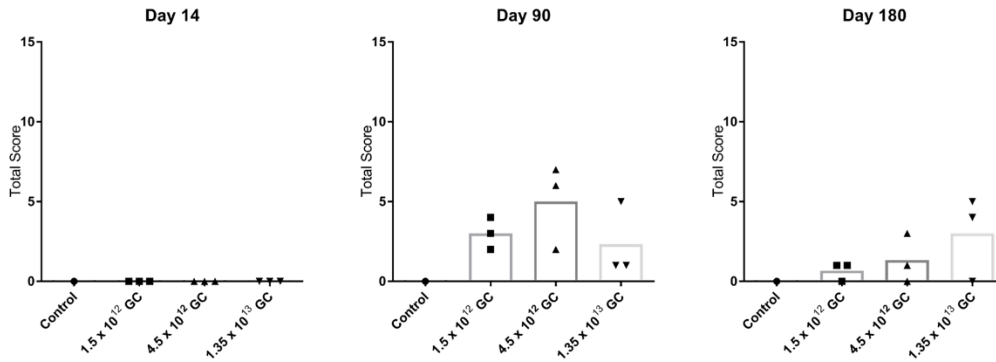

### Supplemental Figure 6. Histological findings in primary sensory neurons of adult NHPs after ICM administration of AAVhu68 expressing human SMN.

A board-certified veterinary pathologist reviewed sections of dorsal root ganglia and spinal cord from the cervical, thoracic and lumbar levels. Neuronal cell body degeneration in dorsal root ganglia and axonal degeneration in the dorsal columns of the spinal cord were assigned a score of 0 (no findings present), or a severity score ranging from 1 (minimal) to 5 (severe). The total score was calculated for each animal by adding the score from the cervical, thoracic and lumbar levels. The maximum severity score possible is 15.



| Dose (GC)             | Animal ID | Necropsy Day | AAVhu68 NAb <sub>60</sub> |     |      |      |      |      |      |      |      |      |      |      |      |      |      |      |      |      |     |
|-----------------------|-----------|--------------|---------------------------|-----|------|------|------|------|------|------|------|------|------|------|------|------|------|------|------|------|-----|
|                       |           |              | Study Day                 |     |      |      |      |      |      |      |      |      |      |      |      |      |      |      |      |      |     |
|                       |           |              | 0                         | 14  | 28   | 45   | 60   | 90   | 120  | 150  | 180  |      |      |      |      |      |      |      |      |      |     |
| Vehicle               | RA2424    | 14           | 5                         | <5  |      |      |      |      |      |      |      |      |      |      |      |      |      |      |      |      |     |
| 1.5x10 <sup>12</sup>  | RA2031    |              | <5                        | 160 |      |      |      |      |      |      |      |      |      |      |      |      |      |      |      |      |     |
|                       | RA1156    |              | <5                        | 80  |      |      |      |      |      |      |      |      |      |      |      |      |      |      |      |      |     |
|                       | RA0704    |              | <5                        | 160 |      |      |      |      |      |      |      |      |      |      |      |      |      |      |      |      |     |
| 4.5x10 <sup>12</sup>  | RA2463    |              | 5                         | 20  |      |      |      |      |      |      |      |      |      |      |      |      |      |      |      |      |     |
|                       | RA2410    |              | <5                        | 160 |      |      |      |      |      |      |      |      |      |      |      |      |      |      |      |      |     |
|                       | RA2433    |              | <5                        | 80  |      |      |      |      |      |      |      |      |      |      |      |      |      |      |      |      |     |
| 1.35x10 <sup>13</sup> | RA2444    |              | <5                        | 160 |      |      |      |      |      |      |      |      |      |      |      |      |      |      |      |      |     |
|                       | RA2363    |              | <5                        | 320 |      |      |      |      |      |      |      |      |      |      |      |      |      |      |      |      |     |
|                       | RA2468    |              | <5                        | 160 |      |      |      |      |      |      |      |      |      |      |      |      |      |      |      |      |     |
| Vehicle               | RA2456    |              | 90 ± 2                    | <5  | <5   | <5   | <5   | <5   | <5   | <5   |      |      |      |      |      |      |      |      |      |      |     |
| 1.5x10 <sup>12</sup>  | RA2369    |              |                           | <5  | 80   | 40   | 80   | 320  | 160  |      |      |      |      |      |      |      |      |      |      |      |     |
|                       | RA2412    | 5            |                           | 160 | 160  | 320  | 640  | 80   |      |      |      |      |      |      |      |      |      |      |      |      |     |
|                       | RA0549    | <5           |                           | 80  | 40   | 1280 | 640  | 320  |      |      |      |      |      |      |      |      |      |      |      |      |     |
| 4.5x10 <sup>12</sup>  | RA1875    | <5           |                           | 80  | 80   | 2560 | 2560 | 2560 |      |      |      |      |      |      |      |      |      |      |      |      |     |
|                       | RA1853    | <5           |                           | 160 | 320  | 1280 | 1280 | 2560 |      |      |      |      |      |      |      |      |      |      |      |      |     |
|                       | RA2360    | <5           |                           | 80  | 160  | 2560 | 2560 | 320  |      |      |      |      |      |      |      |      |      |      |      |      |     |
| 1.35x10 <sup>13</sup> | RA2371    | 5            |                           | 40  | 40   | 1280 | 640  | 640  |      |      |      |      |      |      |      |      |      |      |      |      |     |
|                       | RA2153    | <5           |                           | 160 | 320  | 2560 | 1280 | 1280 |      |      |      |      |      |      |      |      |      |      |      |      |     |
|                       | RA2457    | <5           |                           | 40  | 160  | 2560 | 640  | 320  |      |      |      |      |      |      |      |      |      |      |      |      |     |
| Vehicle               | RA2382    | 180 ± 2      |                           | <5  | <5   | <5   | <5   | <5   | <5   | <5   | <5   | <5   | <5   | <5   | <5   | <5   | <5   | <5   | <5   | <5   |     |
| 1.5x10 <sup>12</sup>  | RA2464    |              |                           | <5  | 2560 | 320  | 1280 | 1280 | 1280 | 1280 | 1280 | 1280 | 1280 | 1280 | 1280 | 1280 | 1280 | 1280 | 1280 | 1280 | 640 |
|                       | RA2434    |              | <5                        | 5   | 80   | 640  | 640  | 320  | 640  | 320  | 640  | 320  | 640  | 320  | 640  | 320  | 640  | 320  | 640  | 320  |     |
|                       | RA2413    |              | <5                        | 160 | 320  | 320  | 320  | 320  | 320  | 640  | 320  | 640  | 320  | 640  | 320  | 640  | 320  | 640  | 320  | 640  | 320 |
| 4.5x10 <sup>12</sup>  | RA2467    |              | <5                        | 160 | 160  | 640  | 640  | 320  | 320  | 640  | 320  | 640  | 320  | 640  | 320  | 640  | 320  | 640  | 320  | 640  | 320 |
|                       | RA2426    |              | <5                        | 80  | 640  | 640  | 640  | 640  | 640  | 1280 | 1280 | 1280 | 1280 | 1280 | 1280 | 1280 | 1280 | 1280 | 1280 | 1280 | 320 |
|                       | RA2150    |              | <5                        | 160 | 80   | 640  | 1280 | 640  | 640  | 640  | 640  | 640  | 640  | 640  | 640  | 640  | 640  | 640  | 640  | 640  | 320 |
| 1.35x10 <sup>13</sup> | RA2452    |              | <5                        | 80  | 40   | 160  | 640  | 160  | 320  | 160  | 320  | 160  | 320  | 160  | 320  | 160  | 320  | 160  | 320  | 160  | 320 |
|                       | RA2400    |              | 20                        | 160 | 1280 | 1280 | 2560 | 1280 | 1280 | 1280 | 1280 | 1280 | 1280 | 1280 | 1280 | 1280 | 1280 | 1280 | 1280 | 1280 | 640 |
|                       | RA2375    |              | 5                         | 160 | 160  | 640  | 1280 | 1280 | 1280 | 1280 | 1280 | 1280 | 1280 | 1280 | 1280 | 1280 | 1280 | 1280 | 1280 | 1280 | 640 |

**Supplemental Figure 7. Neutralizing antibody responses to the vector capsid in serum of adult NHPs after ICM administration of AAVhu68 expressing human SMN.**

The neutralizing antibody titer values reported are the reciprocal dilutions of serum at which in vitro cell transduction was reduced by at least 50% compared to control wells (without sample). The limit of detection was 1:5 dilution of sample. Day 0 samples were collected immediately prior to vector administration.

| Dose (GC)             | Necropsy Day | Animal ID | Antigen | PBMC      |    |    |    |    |     |     | Liver | Spleen | Bone Marrow |     |   |
|-----------------------|--------------|-----------|---------|-----------|----|----|----|----|-----|-----|-------|--------|-------------|-----|---|
|                       |              |           |         | Study Day |    |    |    |    |     |     |       |        |             |     |   |
|                       |              |           |         | 0         | 14 | 28 | 60 | 90 | 120 | 150 |       |        |             | 180 |   |
| Vehicle               | 14           | RA2424    | AAVhu68 | -         | -  |    |    |    |     |     |       | -      | -           | -   |   |
|                       |              |           | hSMN    | -         | -  |    |    |    |     |     |       | -      | -           | -   |   |
| 1.5x10 <sup>12</sup>  |              | RA2031    | AAVhu68 | -         | -  |    |    |    |     |     |       | +      | -           | -   |   |
|                       |              |           | hSMN    | -         | -  |    |    |    |     |     |       | +      | -           | -   |   |
| 4.5x10 <sup>12</sup>  |              | RA1156    | AAVhu68 | -         | -  |    |    |    |     |     |       | -      | -           | +   |   |
|                       |              |           | hSMN    | -         | -  |    |    |    |     |     |       | -      | -           | +   |   |
| 1.35x10 <sup>13</sup> |              | RA0704    | AAVhu68 | -         | -  |    |    |    |     |     |       | -      | -           | +   |   |
|                       |              |           | hSMN    | -         | -  |    |    |    |     |     |       | -      | -           | +   |   |
| 4.5x10 <sup>12</sup>  |              | RA2463    | AAVhu68 | -         | -  |    |    |    |     |     |       | -      | -           | -   |   |
|                       |              |           | hSMN    | -         | -  |    |    |    |     |     |       | -      | -           | -   |   |
| 1.35x10 <sup>13</sup> |              | RA2410    | AAVhu68 | -         | -  |    |    |    |     |     |       | -      | -           | +   |   |
|                       |              |           | hSMN    | -         | -  |    |    |    |     |     |       | -      | -           | +   |   |
| 1.35x10 <sup>13</sup> |              | RA2433    | AAVhu68 | -         | -  |    |    |    |     |     |       | -      | -           | -   |   |
|                       |              |           | hSMN    | -         | -  |    |    |    |     |     |       | -      | -           | -   |   |
| 1.35x10 <sup>13</sup> |              | RA2444    | AAVhu68 | -         | -  |    |    |    |     |     |       | -      | -           | -   |   |
|                       |              |           | hSMN    | -         | -  |    |    |    |     |     |       | -      | -           | -   |   |
| 1.35x10 <sup>13</sup> |              | RA2363    | AAVhu68 | -         | -  |    |    |    |     |     |       | -      | -           | -   |   |
|                       |              |           | hSMN    | -         | -  |    |    |    |     |     |       | -      | -           | -   |   |
| Vehicle               |              | RA2468    | AAVhu68 | +         | +  |    |    |    |     |     |       | -      | -           | -   |   |
|                       |              |           | hSMN    | -         | -  |    |    |    |     |     |       | -      | -           | -   |   |
| 1.5x10 <sup>12</sup>  |              | 90 ± 2    | RA2456  | AAVhu68   | -  | -  | -  | -  | -   |     |       |        | -           | -   | - |
|                       |              |           |         | hSMN      | -  | -  | -  | -  | -   |     |       |        | -           | -   | - |
| 1.5x10 <sup>12</sup>  |              | RA2369    | AAVhu68 | -         | -  | -  | -  | -  | +   |     |       |        | +           | +   | - |
|                       |              |           | hSMN    | -         | -  | -  | -  | -  |     |     |       |        | +           | +   | - |
| 4.5x10 <sup>12</sup>  | RA2412       | AAVhu68   | -       | -         | -  | -  | -  | -  |     |     |       | +      | -           | -   |   |
|                       |              | hSMN      | -       | -         | -  | -  | -  |    |     |     |       | -      | -           | -   |   |
| 4.5x10 <sup>12</sup>  | RA0549       | AAVhu68   | -       | -         | +  | +  | -  |    |     |     |       | +      | -           | -   |   |
|                       |              | hSMN      | -       | -         | -  | +  | +  |    |     |     |       | +      | -           | +   |   |
| 4.5x10 <sup>12</sup>  | RA1875       | AAVhu68   | -       | -         | -  | -  | -  |    |     |     |       | +      | -           | +   |   |
|                       |              | hSMN      | -       | -         | -  | +  | -  |    |     |     |       | +      | -           | +   |   |
| 1.35x10 <sup>13</sup> | RA1853       | AAVhu68   | -       | -         | -  | -  | -  |    |     |     |       | -      | -           | -   |   |
|                       |              | hSMN      | -       | -         | -  | -  | -  |    |     |     |       | -      | -           | -   |   |
| 1.35x10 <sup>13</sup> | RA2360       | AAVhu68   | +       | +         | +  | +  | +  |    |     |     |       | +      | +           | -   |   |
|                       |              | hSMN      | -       | -         | -  | -  | -  |    |     |     |       | +      | +           | -   |   |
| 1.35x10 <sup>13</sup> | RA2371       | AAVhu68   | +       | +         | +  | +  | +  |    |     |     |       | +      | +           | +   |   |
|                       |              | hSMN      | -       | -         | -  | -  | -  |    |     |     |       | +      | +           | +   |   |
| 1.35x10 <sup>13</sup> | RA2153       | AAVhu68   | -       | -         | -  | -  | -  |    |     |     |       | +      | -           | -   |   |
|                       |              | hSMN      | -       | -         | -  | -  | -  |    |     |     |       | -      | -           | -   |   |
| Vehicle               | RA2457       | AAVhu68   | -       | -         | -  | -  | -  | +  | +   |     |       | +      | +           | +   |   |
|                       |              | hSMN      | -       | -         | -  | -  | -  |    |     |     |       | +      | +           | +   |   |
| 1.5x10 <sup>12</sup>  | 180 ± 2      | RA2382    | AAVhu68 | -         | -  | -  | -  | -  | -   | -   |       |        | -           | -   | - |
|                       |              |           | hSMN    | -         | -  | -  | -  | -  | -   | +   | +     |        |             | -   | - |
| 1.5x10 <sup>12</sup>  | RA2464       | AAVhu68   | -       | +         | +  | +  | -  | +  |     |     |       | -      | -           | -   |   |
|                       |              | hSMN      | -       | -         | -  | +  | -  |    |     |     |       | -      | -           | -   |   |
| 1.5x10 <sup>12</sup>  | RA2434       | AAVhu68   | -       | -         | -  | -  | -  | +  | +   |     |       | -      | -           | +   |   |
|                       |              | hSMN      | -       | -         | -  | -  | -  | +  | +   |     |       | -      | -           | +   |   |
| 4.5x10 <sup>12</sup>  | RA2413       | AAVhu68   | -       | -         | -  | -  | -  | -  | -   | +   | +     |        | -           | -   | - |
|                       |              | hSMN      | -       | -         | -  | -  | -  | -  | -   | -   | -     | -      |             | -   | - |
| 4.5x10 <sup>12</sup>  | RA2467       | AAVhu68   | -       | -         | -  | -  | -  | -  | -   | -   | -     |        | -           | -   | - |
|                       |              | hSMN      | -       | -         | -  | -  | -  | -  | -   | -   | -     |        | -           | -   | - |
| 1.35x10 <sup>13</sup> | RA2426       | AAVhu68   | -       | -         | -  | +  | +  | +  | +   | +   | +     |        | +           | +   | - |
|                       |              | hSMN      | -       | -         | -  | -  | +  | +  | +   | +   | +     | +      | +           | +   | - |
| 1.35x10 <sup>13</sup> | RA2150       | AAVhu68   | -       | -         | -  | -  | -  | -  | -   | -   | -     |        | -           | -   | - |
|                       |              | hSMN      | -       | -         | -  | -  | -  | -  | +   | +   | +     |        | -           | -   | - |
| 1.35x10 <sup>13</sup> | RA2452       | AAVhu68   | -       | -         | -  | -  | -  | -  | -   | -   | -     |        | -           | -   | - |
|                       |              | hSMN      | -       | -         | -  | -  | -  | -  | -   | -   | -     |        | -           | -   | - |
| 1.35x10 <sup>13</sup> | RA2400       | AAVhu68   | -       | +         | -  | -  | -  | -  | -   | -   | -     |        | -           | -   | - |
|                       |              | hSMN      | -       | -         | +  | -  | -  | -  | +   | -   | -     |        | -           | -   | - |
| 1.35x10 <sup>13</sup> | RA2375       | AAVhu68   | -       | -         | -  | -  | -  | -  | +   | +   |       |        | -           | -   | - |
|                       |              | hSMN      | -       | -         | -  | -  | -  | -  | -   | -   | -     |        | -           | -   | - |

**Supplemental Figure 8. IFN gamma ELISPOT detection of T cell responses to AAVhu68 capsid and hSMN transgene.** Lymphocytes were isolated from peripheral blood, bone marrow, liver and spleen. T cell responses were measured against pooled overlapping 15-mer peptides comprising the AAVhu68 VP1 sequence (3 peptide pools) or the human SMN sequence (2 peptide pools). + indicates a detectable T cell response (>55 spot forming units and 3-fold greater than unstimulated control) to the indicated antigen. PBMC, peripheral blood mononuclear cells.
